# Supplementary material
Source: Springer Nature journal article supplement (https://www.springermedizin.de/resource/supplementary/12877_2011_688_MOESM1_ESM.pdf/9439998)
Supplement: MOESM1 [file 9439998]

## Population

Emergency Department attendance due to a fall in persons  
≥65 yr and the use of ≥1 fall-risk increasing drugs

## Research outpatient clinic visit

1. Verify in- and exclusion criteria
2. Informed Consent
3. Fall-risk profile, EQ-5D, SF-12
4. Medical history and drug use
5. Comprehensive geriatric assessment
6. Tests
  - timed up-and-go
  - 5x stand test
  - tandem stand test
  - orthostatic hypotension measurement
7. Routine laboratory blood test & DNA analysis
8. X-ray or ECG on indication

*Clinical investigator*

## Randomization

Total  $n=620$  patients

### Intervention Group

$n=310$  patients

Systemic drug assessment including  
drug modification

### Control group

$n=310$  patients

No drug change  
(care as usual)

Follow-up (1-year): every 3 months falls-calendar and  
questionnaire for economic analysis

## Final visit

1. General information, incl. medical history and drug use
2. Questionnaires: Fall-risk profile, EQ-5D, SF-12
3. Functional tests: timed up-and-go; 5x stand test; tandem stand test; orthostatic hypotension
